# Supplementary material for: Vehicular connectivity in urban scenarios: effectiveness and potential of roadside, moving WAVE providers and hybrid solutions
Source: Springer Nature journal article supplement (doi:10.1186/1687-1499-2011-146), 2011-10-28

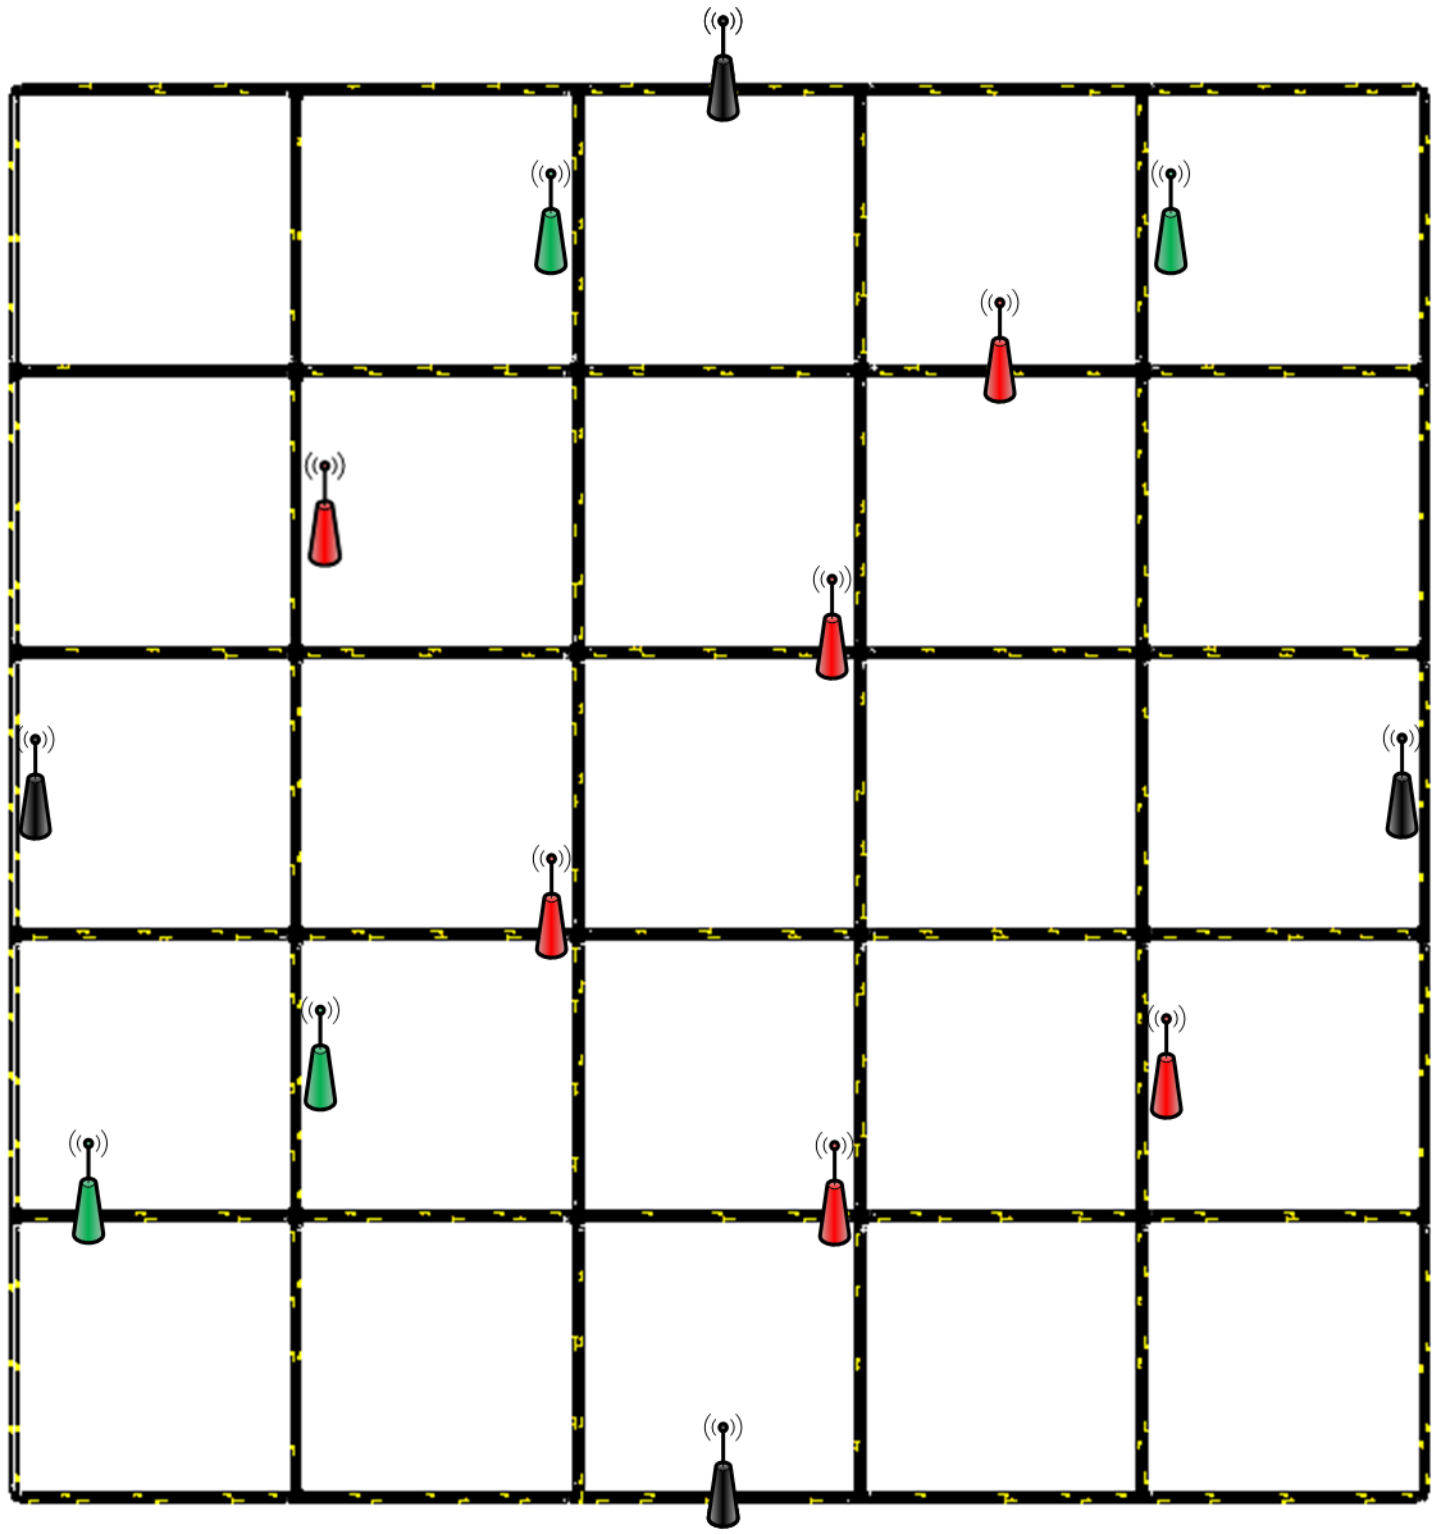

Supplement: 13638_2011_144_MOESM7_ESM.pdf [file 13638_2011_144_MOESM7_ESM.pdf]
